# Supplementary material for: S100a4-Cre–mediated deletion of Ptch1 causes hypogonadotropic hypogonadism: role of pituitary hematopoietic cells in endocrine regulation
Source: JCI journal article supplement (doi:10.1172/jci.insight.126325), 2019-07-02
Supplement: sd1 [file 1]

**Supplemental Figure 1.**

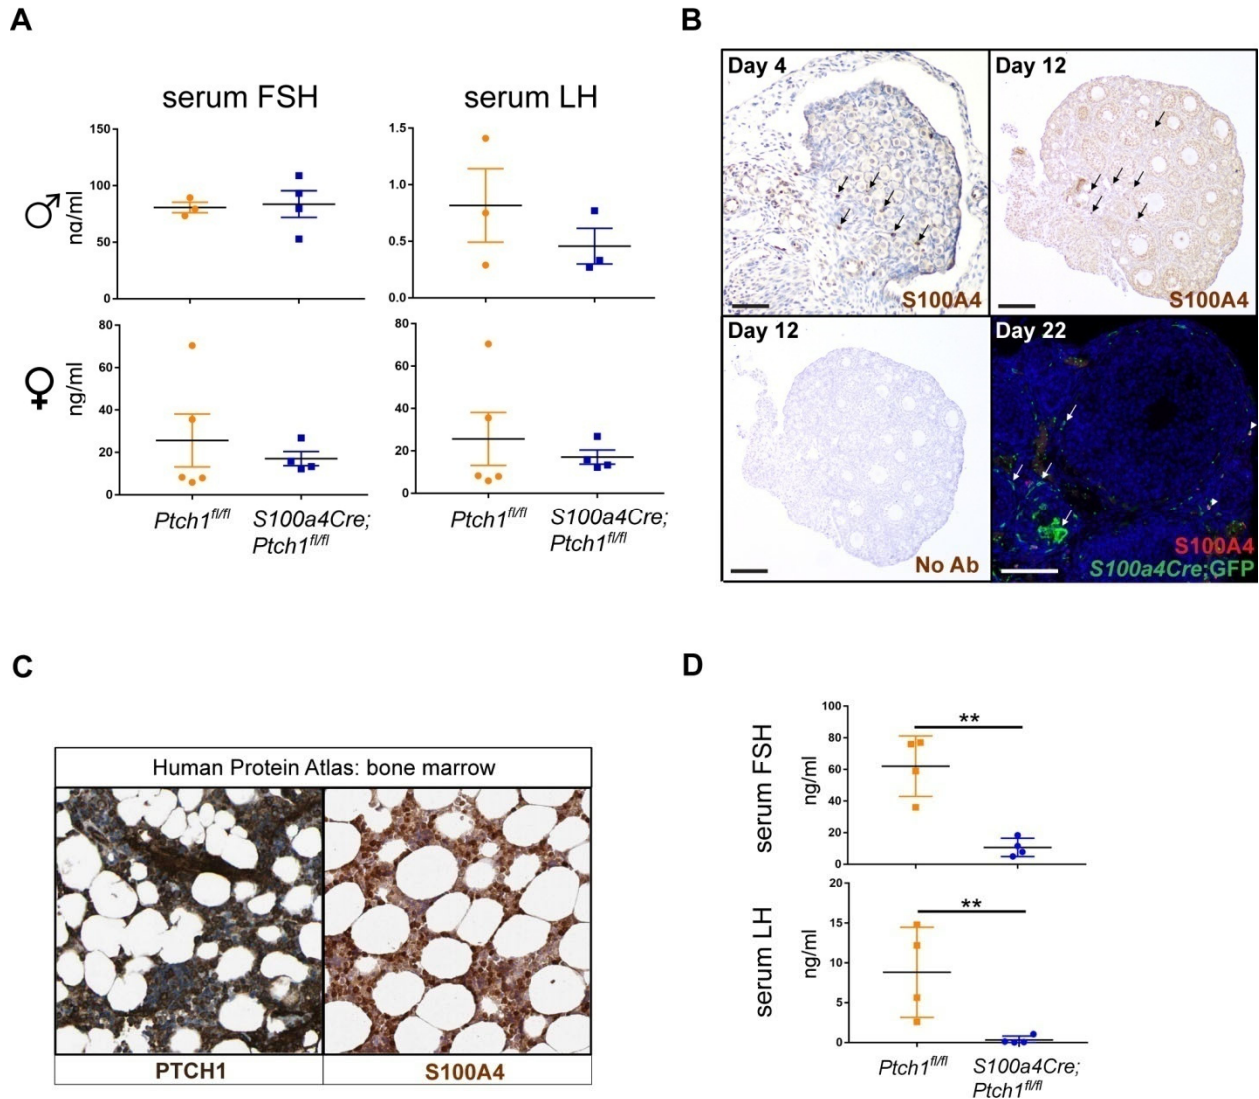

1  
2  
3  
4  
5  
6  
7  
8  
9  
10  
11

**Supplemental Figure 1. Serum gonadotropin levels and S100A4 expression in the mouse ovary and human bone marrow tissue. (A)** Serum FSH and LH levels in wild-type controls and homozygous *Ptch1* mutants at 5 weeks of age. No statistically significant difference was detected by t test. **(B)** Representative images of S100A4 IHC in wild-type mice (Days 4 and 12), as well as S100A4 and GFP IF in the *S100a4-Cre; mTmG* reporter control mice (day 22). Scale bars: 100  $\mu$ m and 200  $\mu$ m. **(C)** Representative images of PTCH1 and S100A4 IHC in human bone marrow tissue (images are from Human Protein Atlas). **(D)** Serum FSH and LH levels in wild-type controls and homozygous *Ptch1* mutants after ovariectomy (OVX) at 8 weeks of age. \*\* $P < 0.01$ ; t test.

## Supplemental. Figure 2.

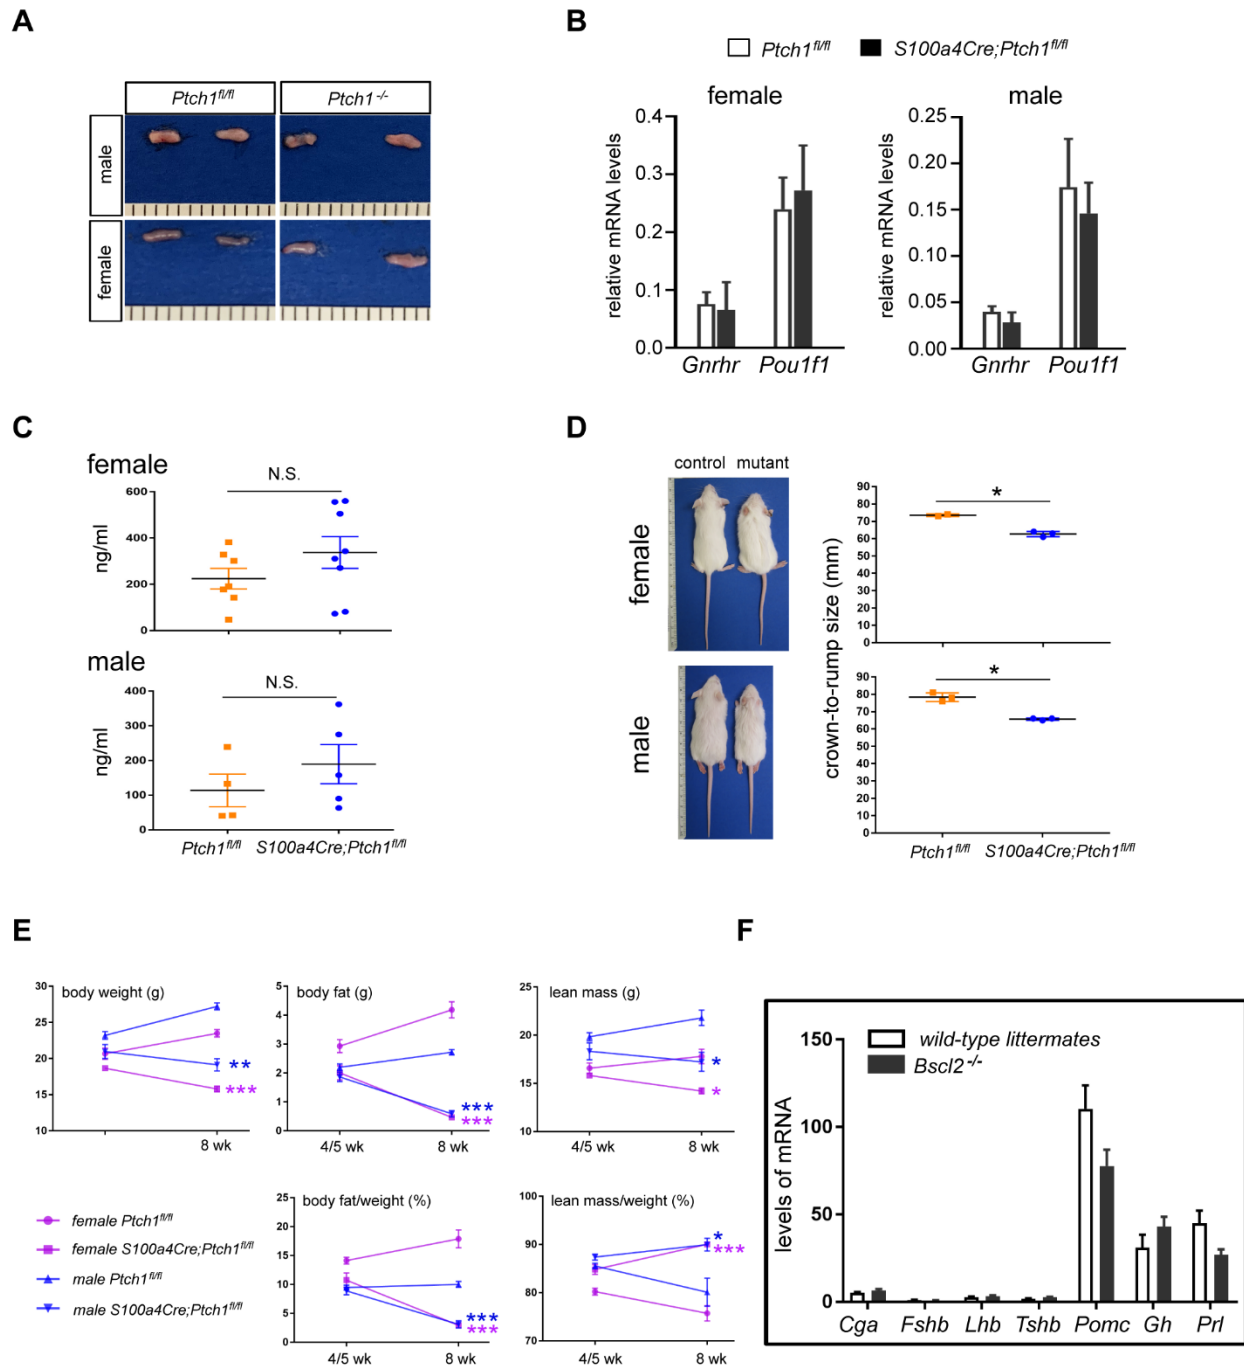

13

14

15 **Supplemental Figure 2. Pituitary differentiation and reduced adiposity in *S100a4-***  
 16 ***Cre;Ptch1<sup>fl/fl</sup>* mutant mice are unlikely the major cause of the severely abnormal pituitary**  
 17 **phenotype in these mice. (A) Representative images of pituitary morphology at 4.5 weeks of**  
 18 **age. Scale is in units of millimeters. (B) Relative mRNA levels of *Gnhr* and *Pou1f1* in whole**  
 19 **pituitary tissues of wild-type controls and homozygous *Ptch1* mutants at 8 weeks of age ( $n \geq 5$ ).**

20 Total RNA was assayed by qPCR and the concentration of each transcript was normalized to that  
21 of a housekeeping gene *Rpl19*. Data are represented as mean  $\pm$  SD. No statistically significant  
22 differences were detected between samples. \* $P < 0.05$ ; *t* test. (C) Serum concentration of  
23 corticosterone in control and homozygous *Ptch1* mutant male and female mice at 8 weeks of age  
24 ( $n=5\sim 8$ ). N.S.: no statistically significant difference;  $P < 0.05$ , *t* test. (D) Body size comparison  
25 between wild-type controls and homozygous *Ptch1* mutant mice at 8 weeks of age ( $n=3$ ). \* $P < 0.05$ ;  
26 *t* test. (E) Body composition of wild-type control and homozygous *Ptch1* mutant mice at 8 weeks  
27 of age assessed by magnetic resonance imaging ( $n=3$ ). \*\* $P < 0.01$ ; \* $P < 0.05$ ; \*\*\* $P < 0.001$ ; *t* test. (F)  
28 Relative mRNA levels of pituitary endocrine function genes in whole pituitary tissues of male wild-  
29 type controls and homozygous *Bsc12* knockout mice (*Bsc12*<sup>-/-</sup>) at 10 weeks of age ( $n=7$ ). Total  
30 RNA was assayed by qPCR and the concentration of each transcript was normalized to that of a  
31 housekeeping gene *Rpl19*. Data are represented as mean  $\pm$  SD. No statistically significant  
32 differences were detected between samples. \* $P < 0.05$ ; *t* test.

33

34 **Supplemental Figure 3.**

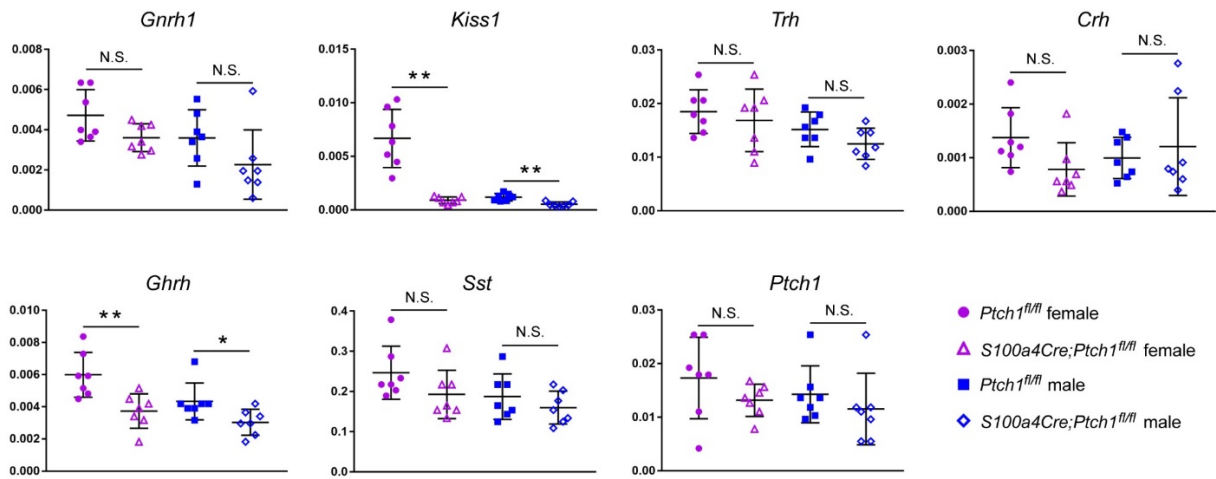

35

36

37 **Supplemental Figure 3. Hypothalamic functions of *S100a4-Cre;Ptch1<sup>fl/fl</sup>* mutant mice are**  
 38 **impaired but cannot fully account for the pituitary defects in these mice.** Relative mRNA  
 39 levels of genes associated with hypothalamic functions and *Ptch1* in hypothalamic tissues of  
 40 wild-type controls and homozygous *S100a4-Cre;Ptch1<sup>fl/fl</sup>* mutant mice at 8 weeks of age (n=7).  
 41 Total RNA was assayed by qPCR and the concentration of each transcript was normalized to  
 42 that of a housekeeping gene *Rpl19*. Data are represented as mean  $\pm$  SD. N.S.: no statistically  
 43 significant differences were detected between samples. \* $P < 0.05$ ; \*\* $P < 0.01$  *t* test.

44 **Supplemental Figure 4.**

**A**

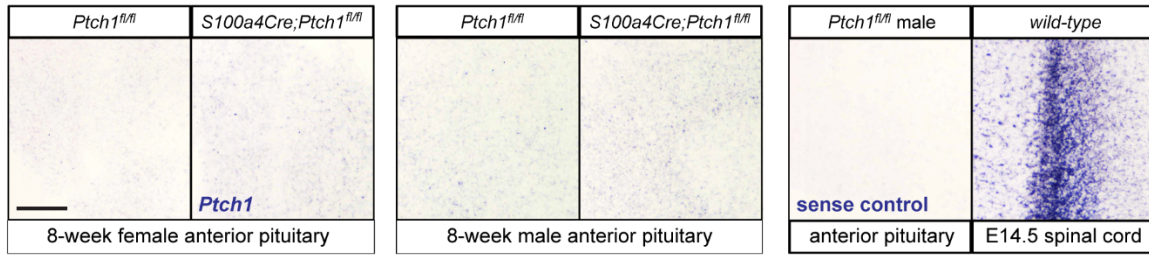

**B**

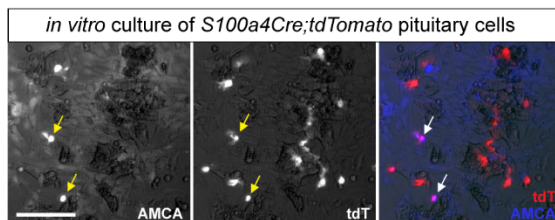

**C**

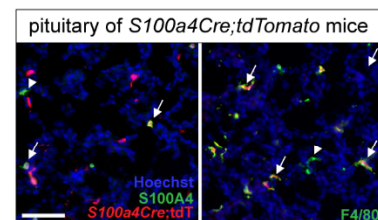

**D**

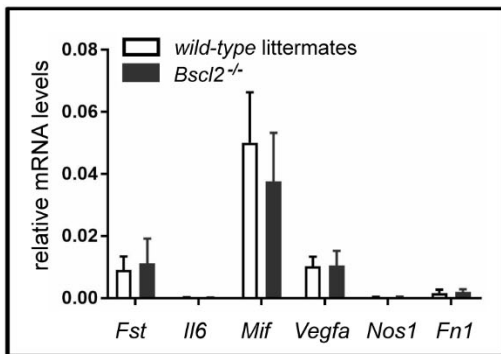

**E**

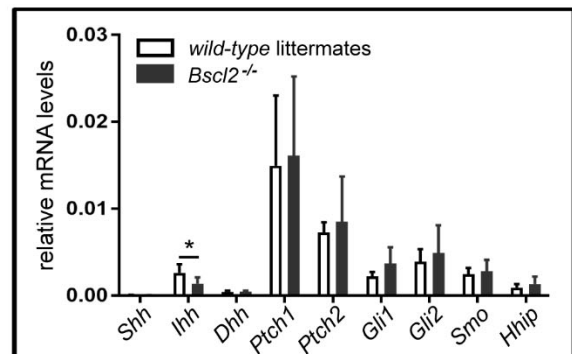

45

46

47 **Supplemental Figure 4. Pituitary hematopoietic cells express *S100a4-Cre* and are likely the**  
 48 **cause of the abnormal pituitary endocrine function in *S100a4-Cre;Ptch1<sup>fl/fl</sup>* mutant mice. (A)**  
 49 Representative images of *in situ* hybridization for *Ptch1* in the anterior pituitary of wild-type control  
 50 and *Ptch1* mutant mice at 8 weeks of age. Sense probes hybridized on anterior pituitary of wild-  
 51 type control male mice were used as negative control, and antisense probes hybridized on whole  
 52 mouse embryo (embryonic day 14.5) sections was used as positive control. Scale bar: 100  $\mu$ m.  
 53 (B) Representative images of IF staining of S100A4, tdTomato (tdT; expression driven by  
 54 *S100a4-Cre*), FOXL2 (a gonadotrope and thyrotrope marker), and F4/80 a macrophage and  
 55 monocyte marker, on frozen tissue sections of anterior pituitaries from *S100a4-Cre;tdTomato*  
 56 reporter mice. Arrows: cells positive for both green and red staining; arrowheads: cells that are  
 57 only positive for green signal. Scale bar: 50  $\mu$ m. (C) Representative images of AMCA labeling of  
 58 *in vitro* cultured pituitary cells from *S100a4-Cre;tdTomato* reporter mice. Arrows: cells positive for  
 59 both AMCA and tdTomato. (D) Relative mRNA levels of genes associated with pituitary

60 microenvironment, and of genes within the HH signaling pathway (**E**) in whole pituitary tissues of  
61 male wild-type controls and homozygous *Bsc12* knockout mice (*Bsc12*<sup>-/-</sup>) at 10 weeks of age (n=7).  
62 Total RNA was assayed by qPCR and the concentration of each transcript was normalized to that  
63 of a housekeeping gene *Rpl19*. Data are represented as mean ± SD. No statistically significant  
64 differences were detected between samples except for *Ihh*. \**P*<0.05; *t* test.

65

**Supplemental Table 1. Real-time PCR primer set sequences (mouse).**

| Gene<br>Symbol | Primer Sequences (5'-3') |                         |
|----------------|--------------------------|-------------------------|
|                | Forward                  | Reverse                 |
| <i>Cyp19a1</i> | TGTTGTGGACTTGGTCATGC     | CAAAGCCAAAAGGCTGAAAG    |
| <i>Fshr</i>    | CAGGTCAACATACCGCTTGA     | TCCCAGGCTGAGTCATATC     |
| <i>Amh</i>     | ACCCTTCAACCAAGCAGAGA     | AAGCGAGTGAGGGTCTCTAGG   |
| <i>Ar</i>      | GGACCATGTTTTACCCATCG     | TCGTTTCTGCTGGCACATAG    |
| <i>Cyp17a1</i> | GTCGCCTTTGCGGATAGTAGT    | TGAGTTGGCTTCCTGACATATCA |
| <i>Cyp11a1</i> | GTACTIONGGCTTTGGCTGGG    | CAGGTCCTGCTTGAGAGGCT    |
| <i>Lhcgr</i>   | CTGAAAACCTCTGCCCTCCAG    | AATCGTAATCCCAGCCACTG    |
| <i>Sfrp4</i>   | AGAAGGTCCATACAGTGGGAAG   | GTTACTGCGACTGGTGCGA     |
| <i>Ins13</i>   | TACTGATGCTCCTGGCTCTG     | TGTCTCTGCTCTAGCCACTGC   |
| <i>Lhb</i>     | AGTTCTGCCAGTCTGCATC      | GACCCCCACAGTCAGAGCTA    |
| <i>Fshb</i>    | GAAGAGTGCCGTTTCTGCAT     | GTGCTGTCGCTGTCACACTT    |
| <i>Cga</i>     | CAAGCTAGGAGCCCCCATCTA    | CACTCTGGCATTTCCTACT     |
| <i>Tshb</i>    | TCAACACCACCATCTGTGCT     | TCTGACAGCCTCGTGTATGC    |
| <i>Pomc</i>    | GAAGATGCCGAGATTCTGCT     | TTTTCAGTCAGGGGCTGTTC    |
| <i>Gh</i>      | CTGGCTGCTGACACCTACAA     | AAGCGAAGCAATTCCATGTC    |
| <i>Prl</i>     | TGGGATCTACTTTGTTTGGTCAC  | ATGGGCAATTTGGCACCTCA    |
| <i>Shh</i>     | AAAGCTGACCCCTTTAGCCTA    | TTCGGAGTTTCTTGTGATCTTCC |
| <i>lhh</i>     | CTCTTGCCTACAAGCAGTTCA    | CCGTGTTCTCCTCGTCCTT     |
| <i>Dhh</i>     | CTTGGCACTCTTGGCACTATC    | GACCCCTTGTTACCCTCC      |
| <i>Ptch1</i>   | TGTGGTCATCCTGATTGCAT     | AAGAGGACAGGCAGCAGAAC    |
| <i>Ptch2</i>   | CTCCGCACCTCATATCCTAGC    | TCCCAGGAAGAGCACTTTGC    |
| <i>Gli1</i>    | TCAATCCAATGACTCCACCA     | TCTCTGGCTGCTCCATAACC    |
| <i>Gli2</i>    | CCCTGCACTGGAGAAGAAAG     | TTCATGTCAATCGGCAAAG     |
| <i>Smo</i>     | CTACGGAGCCACCACCAC       | TCCACTCGGTCATTCTCACA    |
| <i>Hhip</i>    | AGCTGCTCAGTGGAGGAGAG     | CAGGGAGCACATTGGATCTC    |
| <i>Fst</i>     | TGCTGCTACTCTGCCAGTTC     | GTGCTGCAACACTCTTCCTTG   |

|              |                           |                       |
|--------------|---------------------------|-----------------------|
| <i>Ii6</i>   | GATGGATGCTACCAAAGTGGG     | GGAAATTGGGGTAGGAAGGA  |
| <i>Mif</i>   | GCCAGAGGGGTTTCTGTGCG      | GTTTCGTGCCGCTAAAAGTCA |
| <i>Vegfa</i> | CCCACGACAGAAGGAGAGCAGAAGT | CATCAGCGGCACACAGGACGG |
| <i>Nos1</i>  | CTGGTGAAGGAACGGGTCAG      | CCGATCATTGACGGCGAGAAT |
| <i>Fn1</i>   | TTCAAGTGTGATCCCCATGAAG    | CAGGTCTACGGCAGTTGTCA  |

---

67

68

69



70 **Supplemental Table 2.** Primary antibody information and immunostaining conditions.

| Protein        | Antibody    | Type              | Company                      | Dilution | Conditions                |
|----------------|-------------|-------------------|------------------------------|----------|---------------------------|
| GFP            | 11122       | Rabbit polyclonal | Invitrogen                   | 1:1000   | 2 hours, room temperature |
| GFP            | JL8         | Mouse polyclonal  | Clontech                     | 1:250    | Overnight, 4 C°           |
| GFP            | Ab290       | Rabbit polyclonal | Abcam                        | 1:200    | Overnight, 4 C°           |
| S100A4         | 07-2277     | Rabbit polyclonal | Millipore                    | 1:250    | Overnight, 4 C°           |
| Vimentin       | 5741        | Rabbit monoclonal | Cell Signaling Technology    | 1:100    | Overnight, 4 C°           |
| ACTA2          | Ab18147     | Mouse monoclonal  | Abcam                        | 1:500    | Overnight, 4 C°           |
| CD45           | 550539      | Rat monoclonal    | BD Biosciences               | 1:20     | 1 hour, room temperature  |
| CYP17A1        | N/A         | Rabbit polyclonal | Gift from Dr. Alan J. Conley | 1:200    | 2 hours, room temperature |
| RFP (tdTomato) | 600-401-379 | Rabbit polyclonal | Rockland                     | 1: 1000  | Overnight, 4 C°           |
| F4/80          | Ab6640      | Rat monoclonal    | Abcam                        | 1:500    | Overnight, 4 C°           |

## 72 **Supplemental Methods**

73 *Real-time Q-PCR analysis of gene expression.* Total mRNA was extracted from whole ovaries,  
74 testes, and pituitaries using a RNeasy Mini kit (QIAGEN). Total RNA extraction, reverse  
75 transcription, and qPCR were performed using previously described procedures (65). Sequences  
76 of primers used are listed in Supplementary Table 1. Relative levels of mRNA were analyzed  
77 using the Rotor-Gene 6.0 software and normalized to the levels of endogenous ribosomal protein  
78 L19 (*Rpl19*). The number of replicates and statistical analysis used for each data set is denoted  
79 in their respective figure legends.

80 *Histology and immunostaining.* Ovaries and pituitaries were fixed in 4% paraformaldehyde at 4°C  
81 for 4 hours. Testes were fixed in Bouin's (Ricca Chemical Company, Catalog 1120-32) solution  
82 at room temperature for 5 hours. Tissues were paraffin-embedded and sectioned at 5 µm  
83 thickness for staining. Primary antibodies and their incubation conditions are listed in  
84 Supplementary Table 2. For Xgal staining, testes were fixed in 4% paraformaldehyde and lacZ  
85 staining was performed as previously described followed by counter staining with nuclear fast red.  
86 Micrographs were taken with a Zeiss Leica Axioskop 2 Plus with an AxioCamMRm FX camera.  
87 Tissues from at least four animals per sex and genotype were examined and representative  
88 images are presented in the result section.

89 *Flow Cytometry.* Freshly isolated ovaries and pituitaries from *S100a4-Cre;mTmG* reporter mice  
90 were enzymatically dissociated into single cell suspension at 37°C for one hour in DMEM/F12  
91 medium (Gibco) containing 0.1% collagenase/dispase (Roche, 10 269 638 001), 1mg/ml trypsin  
92 (Gibco) , and 25 µg/ml DNase I (Sigma Aldrich, D4527). The tissues and the dissociation medium  
93 were pipetted five times with 1 ml tip at 10-minute intervals, centrifuged for 5 minutes at 500 g at  
94 the end of the dissociation, and ran five times through a 26-gauge syringe. Dispersed cells were  
95 further incubated in the dissociation medium at 37°C for 10 minutes, centrifuged again, and ran

96 through a 40  $\mu\text{m}$  cell strainer. Dispersed cells were span down at 3000 rpm for 5 minutes, re-  
97 suspended in FcR blocking solution (Miltenyi Biotec, 130-092-575), and incubated on ice for 10  
98 minutes. Fluoro-conjugated anti-mouse CD45 (Tonbo Biosciences, 75-0451-U025) were added  
99 to the cells at 1:100 dilution and incubated on ice for 25 minutes. Dispersed cells without any  
100 endogenous fluorescence and cells with single fluorescent signal were used for gating. The  
101 percentage of CD45<sup>+</sup> cells among GFP positive cells were assessed for ovaries and pituitaries  
102 from four mice and graphed using FlowJo Software (FlowJo, LLC).

103 *Body composition analysis (MRI):* The whole body weight and the weight of lean mass and  
104 adipose tissue were quantified in *S100a4Cre;Ptch1<sup>fl/fl</sup>* mutant mice and their littermate controls at  
105 4/5 (4 for females and 5 for males) weeks and 8 weeks of age using the EchoMRI (Echo Medical  
106 system, Houston, TX), which is an Nuclear Magnetic Resonance system (NMR-MRI-based  
107 technology) that measures whole body fat mass (1), lean tissue mass, free fluid, and total body  
108 water in live animals up to 100 grams (2), without the need for anesthesia, in 69 seconds per  
109 mouse.

110 *Immunogold labeling and optimal cell structure imaging of pituitary.* For immunogold labeling,  
111 fixed tissues were stained with uranyl acetate (2% w/v in 0.1M acetate buffer), dehydrated through  
112 increasing concentration of methanol (70–100%) at 20 °C and embedded in LR Gold acrylic resin  
113 (London Resin Company Ltd, Reading, UK). Pituitary sections were incubated for 2 hours at room  
114 temperature with GFP primary antibody (Invitrogen) followed by a 1-hour incubation with a 15 nm  
115 gold-conjugated donkey anti-rabbit secondary antibody (1:60; British Biocell International, Cardiff,  
116 UK). Specificity of antibody labeling was confirmed in negative control sections in which the  
117 primary antibody was replaced with non-immune serum and no labeling was observed in these  
118 sections. Finally, sections were counterstained with lead citrate and uranyl acetate. For optimal  
119 cell structure imaging, fixed tissue were stained with osmium tetroxide (1% in 0.1M phosphate  
120 buffer) for 1 hour, and uranyl acetate (2% w/v in distilled water) for 1 hour. Stained sections were

121 examined on a JOEL 1010 transmission electron microscope (JOEL USA Inc., Peabody, MA,  
122 USA) fitted with a Orius digital camera (Gatan, USA). Sections from three animals per group were  
123 examined.

124 *In situ hybridization (ISH)* was performed on 25  $\mu$ m thick sections cut from fresh-frozen pituitaries  
125 collected from *S100a4Cre;Ptch1<sup>fl/fl</sup>* mutant mice and their wild-type littermate controls at 8 weeks  
126 of age. Sections from embryonic day 14.5 mice were used as positive controls. Digoxigenin (DIG)-  
127 labeled antisense probes against *Ptch1* mRNA and the corresponding sense control probes were  
128 synthesized from reverse-transcribed mouse cDNA as templates using RNA labeling kits (Roche).  
129 The primers used for generating *Ptch1* probes were published in Allen Brain Atlas (Forward:  
130 AAGCCCATCGACATTAGTCAGT; Reverse: ATAAGAGGACAGGCAGCAGAAC). The ISH  
131 procedure was performed by the RNA *In Situ* Hybridization Core at Baylor College of Medicine  
132 using an automated robotic platform as previously described (3).

133 *Labeling of folliculo-stellate cells with  $\beta$ -Ala-Lys-N<sup>ε</sup>-AMCA (AMCA)*. AMCA is a UV-excitabile  
134 dipeptide used for labeling and imaging of FS cells (4-6). Pituitaries from *S100a4-Cre;tdTomato*  
135 reporter mice were removed immediately after euthanasia of the mice and washed in warm  
136 Hank's balanced salt solution (HBSS) before they were enzymatically digested and dispersed into  
137 single cells suspensions using protocol from a previous study (7). Dispersed cells were re-  
138 suspended and plated into 24-well cell culture plate (Thermo Fisher Scientific, 144530) coated  
139 with poly-D-Lysine (Sigma, P6407) at a density of  $1 \times 10^5$  in M-199 medium (GIBCO,31100-035)  
140 supplemented with 10% FBS, 1% antibiotic-antimycotic (Wisent 450-115-EL) and 50  $\mu$ g/ml  
141 gentamicin (Wisent 450-135-XL). After overnight culture, cells were washed with warm HBSS and  
142 incubated with 40  $\mu$ M AMCA (Biotrend, BP0352) for 3 hours (37  $^{\circ}$ C; 5% CO<sub>2</sub>). As a control, cells  
143 were also incubated with 40  $\mu$ M AMCA but at 4  $^{\circ}$ C for 3 hours. Cells were then washed three  
144 times with cold HBSS and imaged for florescent signals using Zeiss AxioPlan2 microscope.

145 **Reference for Supplementary Material**

- 146 1. Taicher GZ, Tinsley FC, Reiderman A, and Heiman ML. Quantitative magnetic  
147 resonance (QMR) method for bone and whole-body-composition analysis. *Anal Bioanal*  
148 *Chem.* 2003;377(6):990-1002.
- 149 2. Abu-Elheiga L, Oh W, Kordari P, and Wakil SJ. Acetyl-CoA carboxylase 2 mutant mice  
150 are protected against obesity and diabetes induced by high-fat/high-carbohydrate diets.  
151 *Proc Natl Acad Sci U S A.* 2003;100(18):10207-12.
- 152 3. Yaylaoglu MB, Titmus A, Visel A, Alvarez-Bolado G, Thaller C, and Eichele G.  
153 Comprehensive expression atlas of fibroblast growth factors and their receptors  
154 generated by a novel robotic in situ hybridization platform. *Dev Dyn.* 2005;234(2):371-  
155 86.
- 156 4. Fauquier T, Guerineau NC, McKinney RA, Bauer K, and Mollard P. Folliculostellate cell  
157 network: a route for long-distance communication in the anterior pituitary. *Proc Natl Acad*  
158 *Sci U S A.* 2001;98(15):8891-6.
- 159 5. Golan M, Hollander-Cohen L, and Levavi-Sivan B. Stellate Cell Networks in the Teleost  
160 Pituitary. *Sci Rep.* 2016;6:24426.
- 161 6. Otto C, tom Dieck S, and Bauer K. Dipeptide uptake by adenohipophysial  
162 folliculostellate cells. *Am J Physiol.* 1996;271(1 Pt 1):C210-7.
- 163 7. Ho CC, Zhou X, Mishina Y, and Bernard DJ. Mechanisms of bone morphogenetic  
164 protein 2 (BMP2) stimulated inhibitor of DNA binding 3 (Id3) transcription. *Mol Cell*  
165 *Endocrinol.* 2011;332(1-2):242-52.

166
